# Supplementary material
Source: Research Square preprint supplement (doi:10.21203/rs.3.rs-8875648/v1)
Supplement: Supplementary file 1 [file e9ac3f4f687fbd7f74097473.docx]

**Table S1.** Sensitivity analysis: The cumulative associations between NO2 and ischemic stroke comparing different exposure windows

| Lags | Odds ratio (95% CI) | BIC |
| --- | --- | --- |
| 0-3 | 1.050 (1.029;1.072) | 1467596 |
| 0-4 | 1.057 (1.035;1.080) | 1467590 |
| 0-5 | 1.064 (1.041; 1.088) | 1467585 |
| 0-6 | 1.061 (1.038; 1.085) | 1467592 |
